# Supplementary material for: Neutrophil extracellular traps potentiate effector T cells via endothelial senescence in uveitis
Source: JCI journal article supplement (doi:10.1172/jci.insight.180248), 2025-01-22
Supplement: sd1 [file 1]

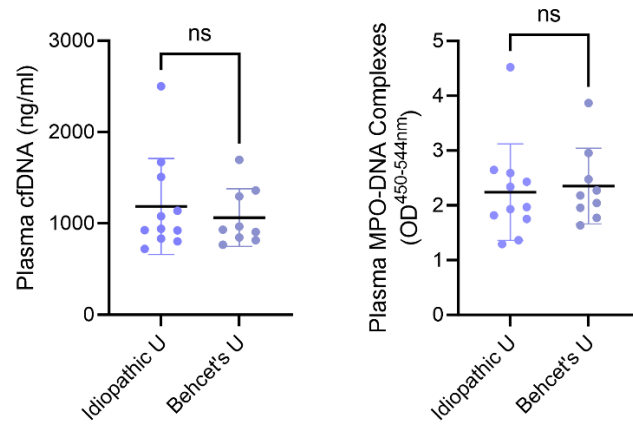

### Supplemental Figure 1 NETs between idiopathic and Behcet's uveitis patients.

CfDNA and the MPO-DNA complex were detected in the plasma of idiopathic uveitis (n=11) and Behcet's uveitis patients (n=9). Data are presented as the mean $\pm$ SD. <sup>ns</sup>p>0.05 for Mann-Whitney test.

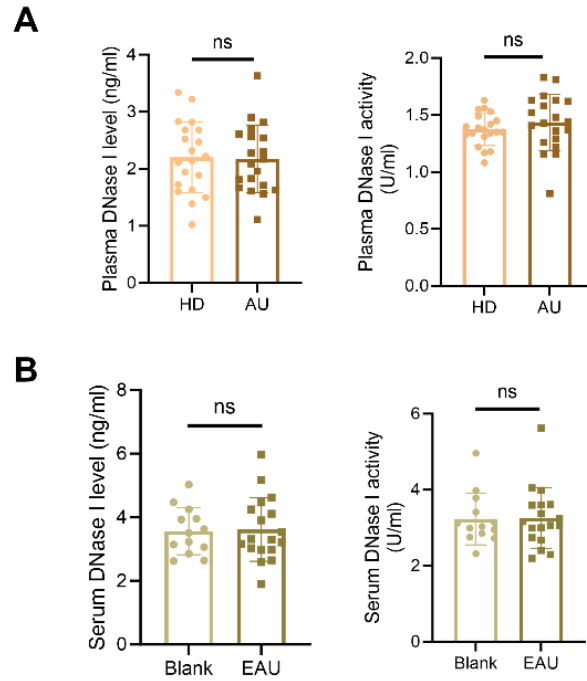

**Supplemental Figure 2 Detection of DNase I level and activity from human plasma and mouse serum.**

(A) DNase I level and activity were detected in the plasma of AU patients (n=20) and HD (n=20). (B) Serum from EAU (n=18) and blank (n=13) mice was also collected for DNase I level and activity detection. Data are presented as the mean $\pm$ SD. <sup>ns</sup>p>0.05 for student's unpaired t test (A) and Mann-Whitney test (B).

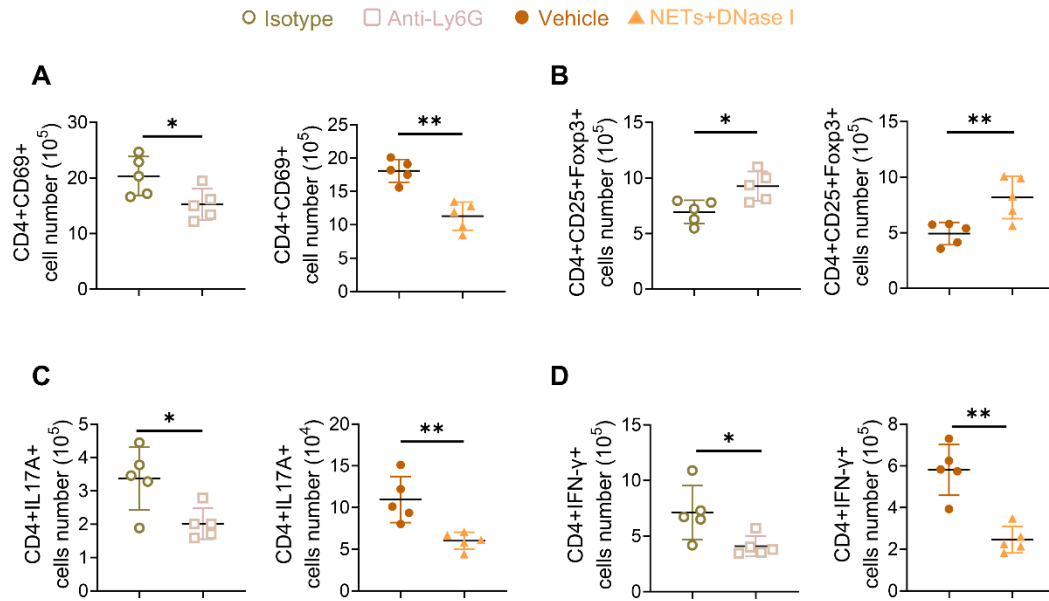

**Supplemental Figure 3 Anti-Ly6G antibody and DNase I regulated systemic immune cells.**

(A-D) Lymphocytes from the spleen were calculated to evaluate the number of early activated CD4+T cells (CD4+CD69+), Tregs (CD4+CD25+Foxp3+), Th17 cells (CD4+IL17A+) and Th1 cells (CD4+IFN- $\gamma$ +) from EAU mice treated with anti-Ly6G antibody or DNase I with their control on day 14 after immunization (n=5). Representative data from at least three independent experiments. Data are presented as the mean $\pm$ SD. \*p<0.05, \*\*p<0.01 for Mann-Whitney test (A-D).

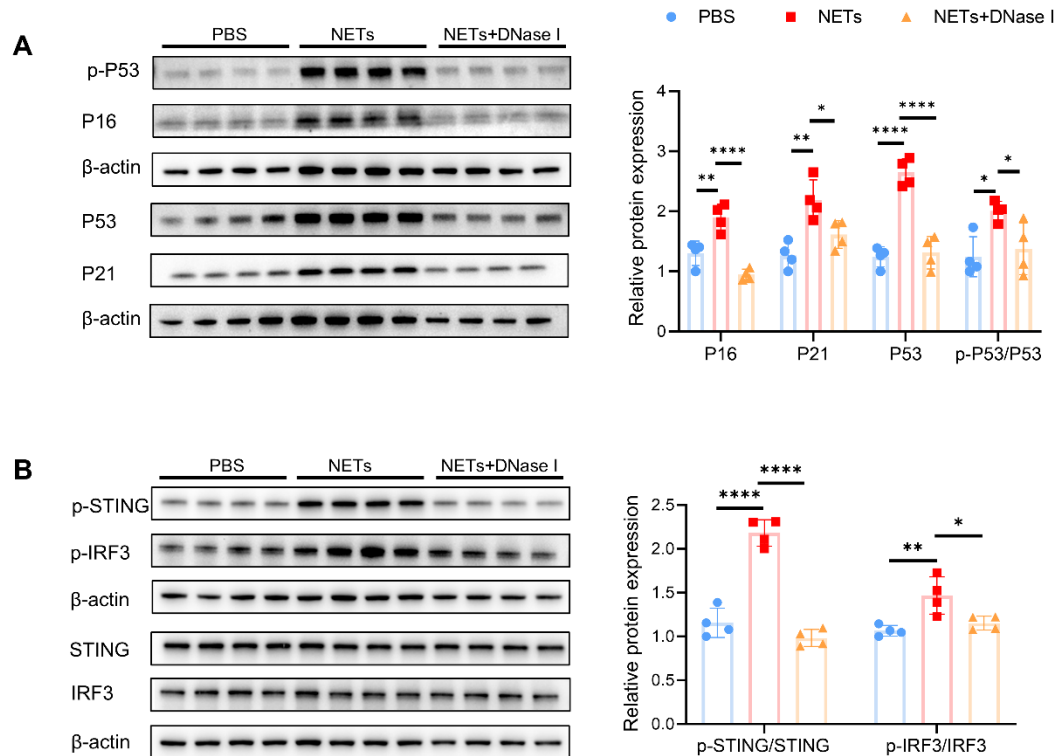

**Supplemental Figure 4 NETs regulated the senescence process of RMECs.**

(A) The level of p-P53, P16, P53, P21 and β-actin in RMECs were detected by WB assay and their statistical graphs were shown (n=4). (B) The level of p-STING, p-IRF3, STING, IRF3 and β-actin in RMECs were detected by WB assay and their statistical graphs were shown (n=4). Representative data from at least three independent experiments. Data are presented as the mean±SD. \*p<0.05, \*\*p<0.01, \*\*\*p<0.001, \*\*\*\*p<0.0001 for one-way ANOVA (A and B).

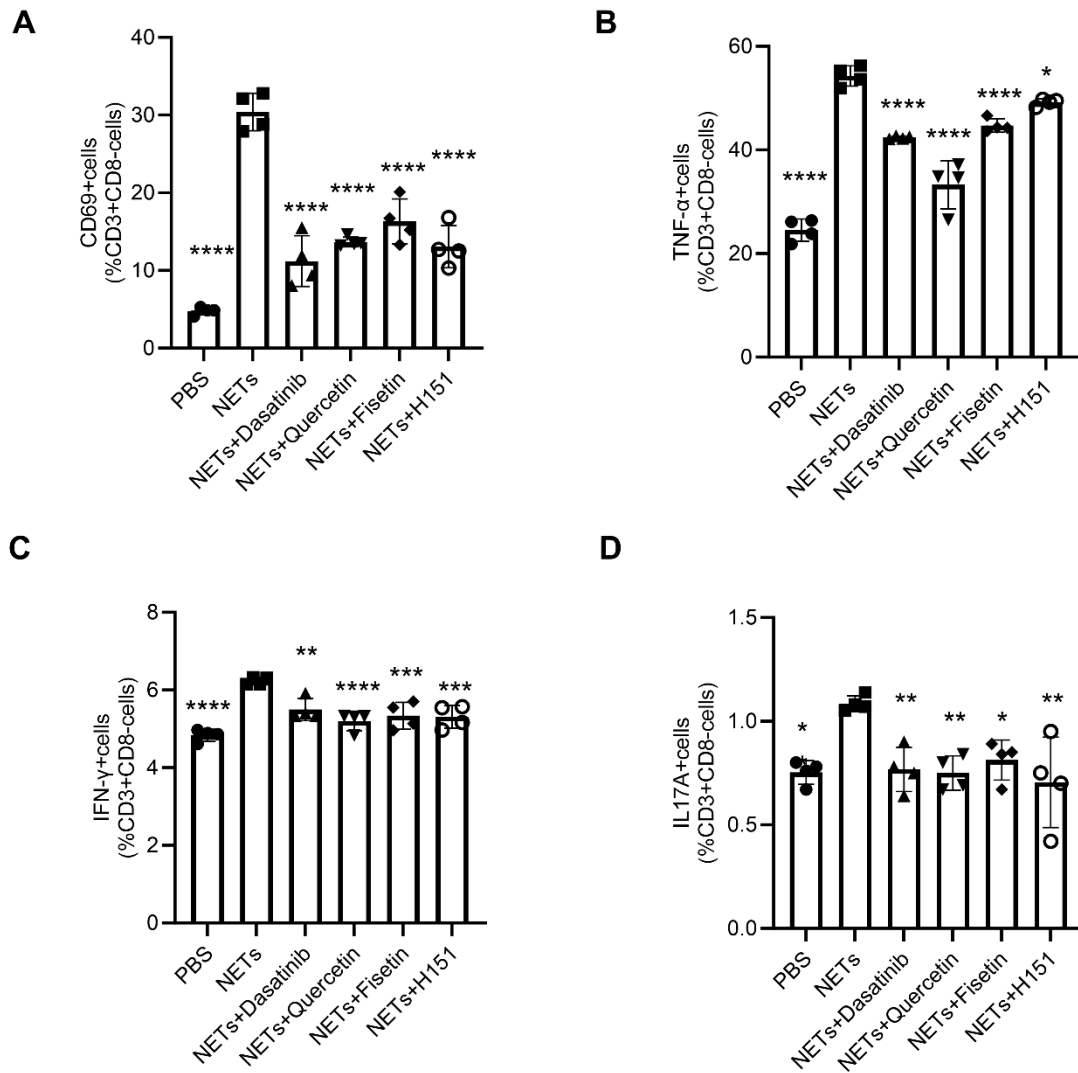

**Supplemental Figure 5 The statistic graphs of immune cell frequencies after medication.**

(A-D) The statistic graphs of CD69, TNF- $\alpha$ , IFN- $\gamma$  and IL17A expression on human CD4<sup>+</sup> T cells (CD3+CD8-) after coculture with RMECs pretreated with PBS, NETs, or NETs plus dasatinib, quercetin, fisetin or H151 (n=4). Representative data from at least three independent experiments. Data are presented as the mean $\pm$ SD. \*p<0.05, \*\*p<0.01, \*\*\*p<0.001, \*\*\*\*p<0.0001 for one-way ANOVA (A-D).

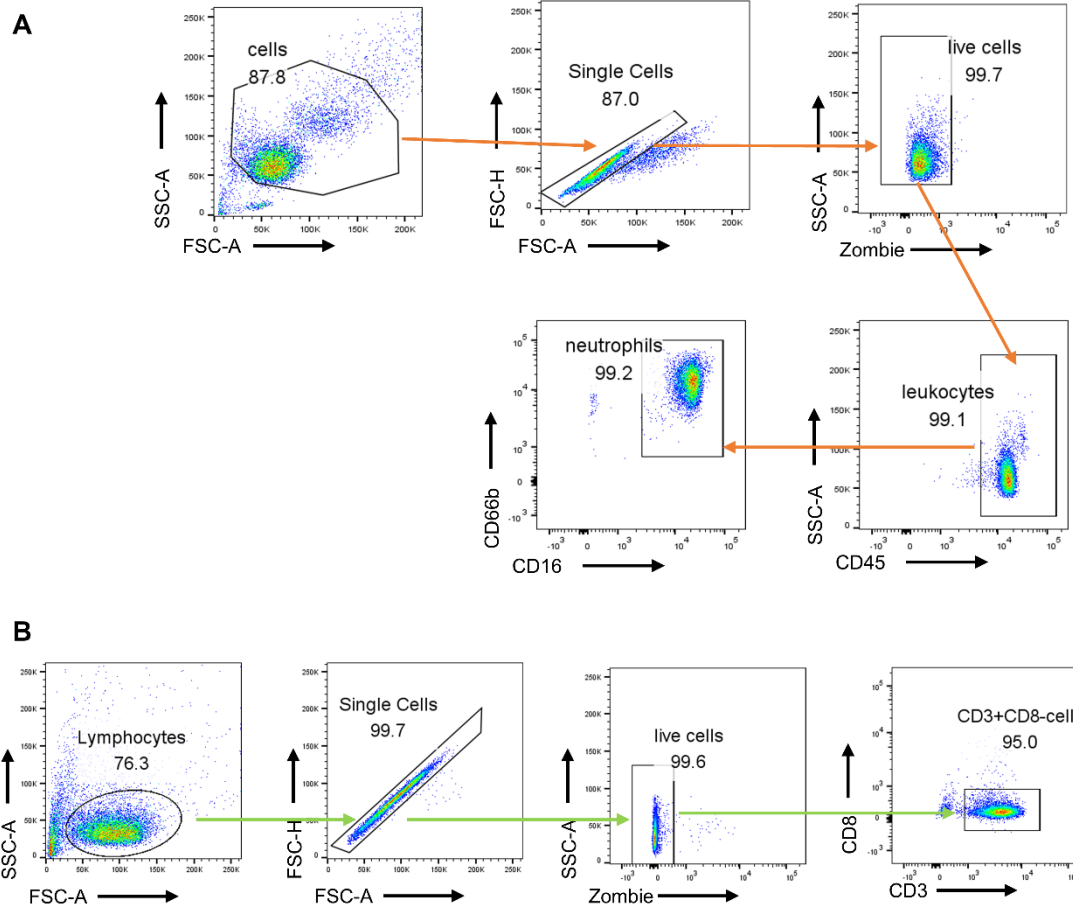

**Supplemental Figure 6 Human cell flow cytometry gating strategy.**

**(A)** Gating strategy of neutrophils from human blood. **(B)** Gating strategy of sorted human CD4<sup>+</sup> T cells.

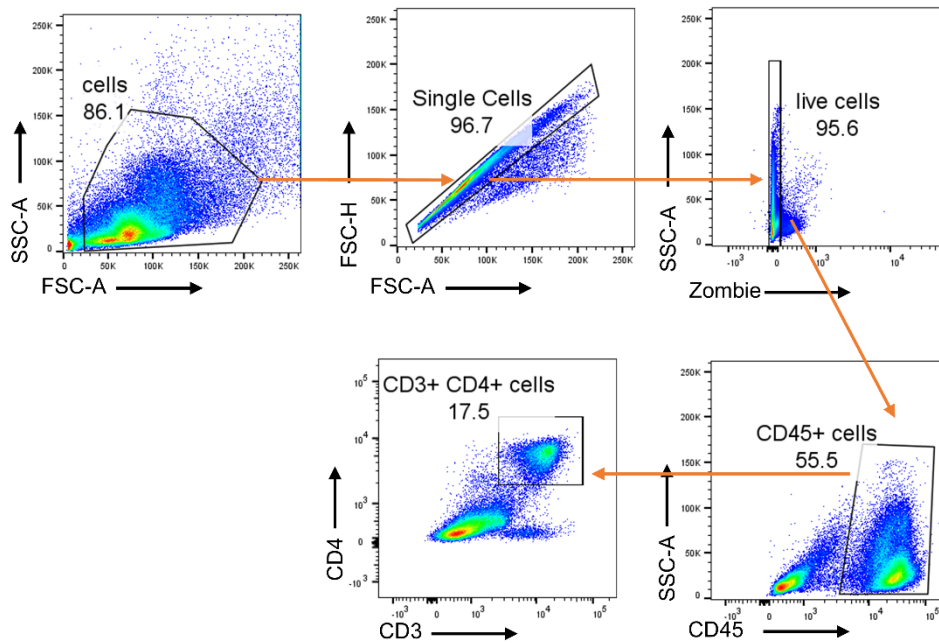

**Supplemental Figure 7 Mouse cell flow cytometry gating strategy.**

Gating strategy of CD4<sup>+</sup> T cells from mouse spleen.

**Supplemental Table 1 Clinical characteristics of active AU patients.**

| No. | Age (yrs) | Sex | Context                    | Keratic precipitate <sup>A</sup> | Anterior chamber cell <sup>A</sup> | Vitreous cell <sup>A</sup> | Diagnosis    |
|-----|-----------|-----|----------------------------|----------------------------------|------------------------------------|----------------------------|--------------|
| 1   | 33        | M   | Newly diagnosed, untreated | -                                | +                                  | ++                         | Idiopathic U |
| 2   | 27        | M   | Relapse, off therapy       | ++                               | ++                                 | +++                        | Behcet's U   |
| 3   | 41        | M   | Relapse, off therapy       | +                                | +                                  | ++                         | Idiopathic U |
| 4   | 38        | F   | Relapse, off therapy       | -                                | ++                                 | +                          | Idiopathic U |
| 5   | 23        | M   | Relapse, off therapy       | +                                | Hypopyon                           | +++                        | Behcet's U   |
| 6   | 24        | M   | Relapse, off therapy       | +                                | ++                                 | +                          | Idiopathic U |
| 7   | 18        | M   | Relapse, off therapy       | ++                               | +                                  | +                          | Behcet's U   |
| 8   | 42        | M   | Newly diagnosed, untreated | +                                | +++                                | +++                        | Idiopathic U |
| 9   | 40        | F   | Relapse, off therapy       | -                                | ++                                 | ++                         | Behcet's U   |
| 10  | 19        | F   | Newly diagnosed, untreated | ++                               | +++                                | ++                         | Idiopathic U |
| 11  | 39        | F   | Newly diagnosed, untreated | +                                | Hypopyon                           | +++                        | Behcet's U   |
| 12  | 35        | F   | Newly diagnosed, untreated | ++                               | +++                                | ++++                       | Idiopathic U |
| 13  | 43        | F   | Relapse, off therapy       | +                                | ++                                 | +                          | Behcet's U   |
| 14  | 29        | F   | Relapse, off therapy       | ++                               | ++                                 | ++++                       | Behcet's U   |
| 15  | 20        | F   | Newly diagnosed, untreated | +                                | +                                  | ++                         | Idiopathic U |
| 16  | 22        | F   | Relapse, off therapy       | +                                | Hypopyon                           | +++                        | Behcet's U   |
| 17  | 32        | M   | Newly diagnosed, untreated | ++                               | ++                                 | ++                         | Idiopathic U |
| 18  | 51        | M   | Newly diagnosed, untreated | +                                | +                                  | +                          | Behcet's U   |
| 19  | 44        | F   | Newly diagnosed, untreated | +                                | +                                  | +                          | Idiopathic U |
| 20  | 35        | M   | Relapse, off therapy       | ++                               | +++                                | +                          | Idiopathic U |

F, female; M, male; U, uveitis. <sup>A</sup>The keratic precipitate, anterior chamber cell and vitreous cell of the heavier eye was recorded, '-' indicates none, and '+' denotes increasing numbers.

**Supplemental Table 2 Clinical characteristics of AU patients in active and remission/inactive phase.**

| No. | Sex | Age (yr) | Diagnosis    | Context and medication                                     | Keratic precipitate <sup>A</sup> | Anterior chamber cell <sup>A</sup> | Vitreous cell <sup>A</sup> |
|-----|-----|----------|--------------|------------------------------------------------------------|----------------------------------|------------------------------------|----------------------------|
| 1   | M   | 42       | Idiopathic U | Relapse, off therapy                                       | -                                | -                                  | ++                         |
|     |     |          |              | Inactive: MMF 0.75mg bid                                   | -                                | -                                  | -                          |
| 2   | M   | 34       | Behcet's U   | Relapse, off therapy                                       | ++                               | ++                                 | ++                         |
|     |     |          |              | Inactive: ADA 40mg q2w                                     | -                                | -                                  | -                          |
| 3   | F   | 25       | Idiopathic U | Remission                                                  | -                                | -                                  | -                          |
|     |     |          |              | Relapse, off therapy                                       | -                                | ++                                 | ++                         |
| 4   | F   | 43       | Behcet's U   | Relapse, off therapy                                       | -                                | +                                  | ++                         |
|     |     |          |              | Inactive: MMF 0.75g bid; ADA 40mg q2w; prednisone 10mg qd  | -                                | -                                  | -                          |
| 5   | F   | 36       | Idiopathic U | Newly diagnosed, untreated                                 | +                                | +                                  | +                          |
|     |     |          |              | Remission                                                  | -                                | -                                  | -                          |
| 6   | F   | 20       | Idiopathic U | Relapse, off therapy                                       | +                                | +                                  | ++                         |
|     |     |          |              | Inactive: MTX 15mg qw; ADA 40mg q2w                        | -                                | -                                  | -                          |
| 7   | M   | 36       | Behcet's U   | Relapse, off therapy                                       | ++                               | Hypopyon                           | ++                         |
|     |     |          |              | Inactive: MMF 0.75g bid; prednisone 10mg qd                | -                                | -                                  | -                          |
| 8   | F   | 18       | Idiopathic U | Relapse, off therapy                                       | +                                | +++                                | +                          |
|     |     |          |              | Inactive: MTX 15mg qw; ADA 40mg q2w                        | -                                | -                                  | -                          |
| 9   | M   | 50       | Idiopathic U | Relapse, off therapy                                       | -                                | +                                  | ++                         |
|     |     |          |              | Inactive: CsA 0.75g bid; prednisone 2.5mg qd; ADA 40mg q2w | -                                | -                                  | -                          |
| 10  | F   | 25       | Behcet's U   | Newly diagnosed, untreated                                 | ++                               | +                                  | ++                         |
|     |     |          |              | Inactive: MTX 15mg qw; ADA 40mg q2w                        | -                                | -                                  | -                          |
| 11  | M   | 19       | Idiopathic U | Newly diagnosed, untreated                                 | +                                | ++                                 | ++                         |
|     |     |          |              | Inactive: MTX 15mg qw; ADA 40mg q2w                        | -                                | -                                  | -                          |
| 12  | M   | 53       | Idiopathic U | Newly diagnosed, untreated                                 | ++                               | +                                  | ++                         |
|     |     |          |              | Inactive: CsA 0.5g bid; prednisone 10mg qd; ADA 40mg q2w   | -                                | -                                  | -                          |
| 13  | M   | 38       | Behcet's U   | Relapse, off therapy                                       | +                                | ++                                 | ++                         |
|     |     |          |              | Inactive: ADA 40mg q2w; prednisone 10mg qd; AZA 50mg tid   | -                                | -                                  | -                          |

ADA, adalimumab; AZA, Azathioprine; bid, twice per day; CsA, Cyclosporin A; F, female; M, male; MMF, mycophenolate mofetil; MTX, methotrexate; qd, once per day; qw, once per week; q2w, once per two weeks; tid, three times per day; U, uveitis. <sup>A</sup>The keratic precipitate, anterior chamber cell and vitreous cell of the heavier eye was recorded, '-' indicates none, and '+' denotes increasing numbers.
